# Supplementary material for: SDUST2023VGGA: A Global Ocean Vertical Gradient of Gravity Anomaly Model Determined from Multidirectional Data from Mean Sea Surface
Source: Copernicus journal article supplement (doi:10.5194/essd-2024-544), 2024-11-28

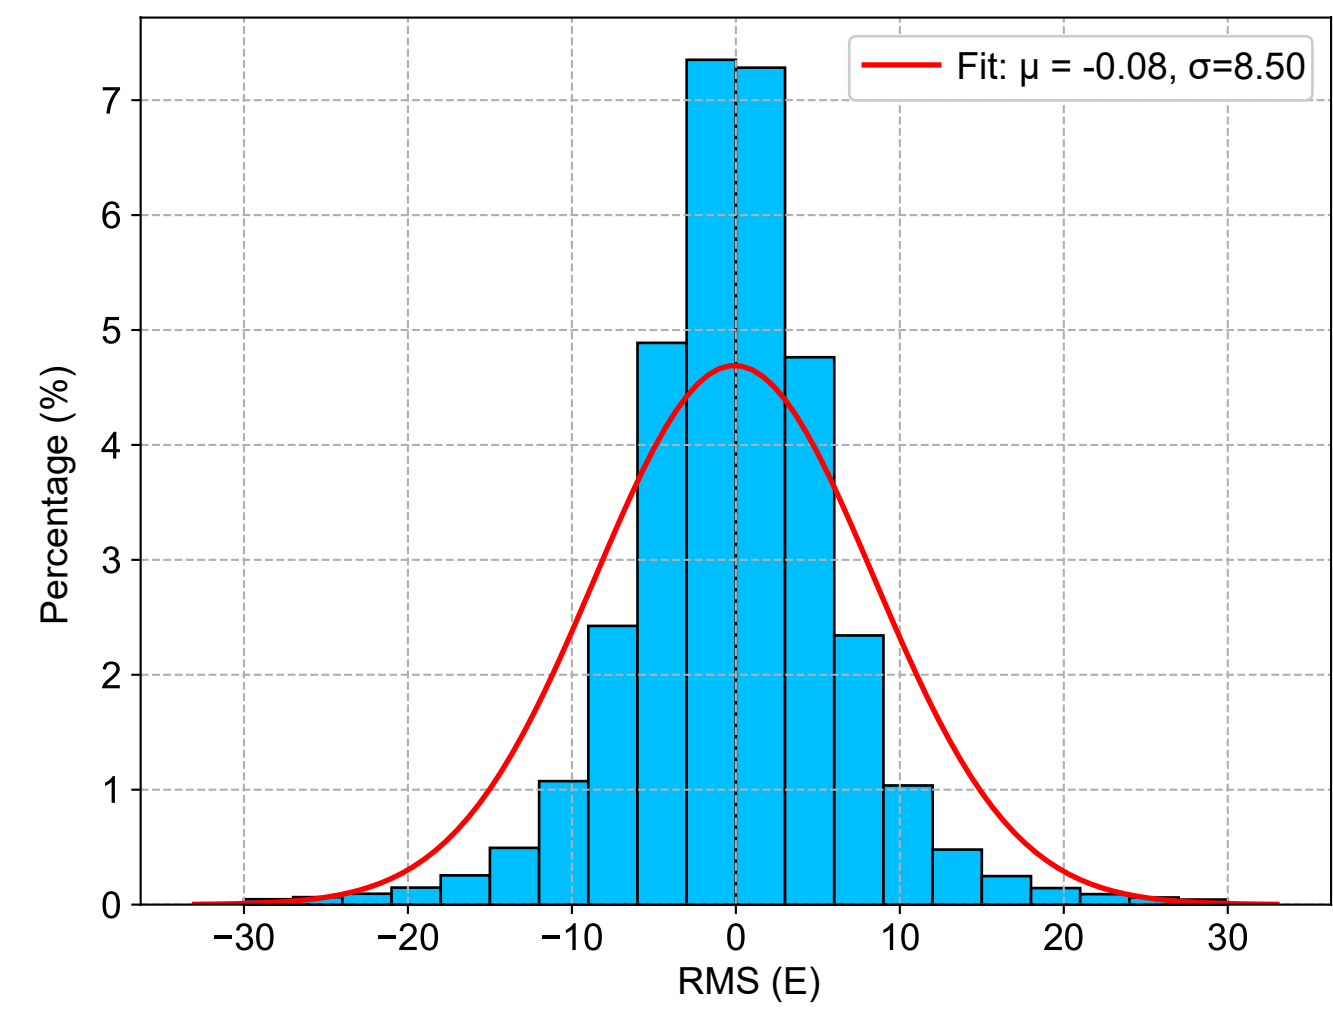

Supplement: Supplementary file [file essd-2024-544-AC3-supplement.zip]
